# Supplementary material for: A novel drug response score more accurately predicts renoprotective drug effects than existing renal risk scores
Source: PubMed Central journal article supplement — Ther Adv Endocrinol Metab. 2021 Feb 5;12:2042018820974191. doi: 10.1177/2042018820974191 (PMC7876574; doi:10.1177/2042018820974191), 2021-02-05
Supplement: sj-pdf-1-tae-10.1177_2042018820974191.pdf [file sj-pdf-1-tae-10.1177_2042018820974191.pdf]

**Supplement to:**

**A novel drug response score more accurately predicts renoprotective drug effects than existing renal risk scores**

**Content:**

**S Table 1:** Published and included renal risk scores

**S Table 2A:** Characteristics of the populations used to develop the renal risk scores

**S Table 2B:** Characteristics of the RENAAL clinical trial population

**Figure S1:** Calibration plots of the ADVANCE, KFRE, and PRE score

**Figure S2:** Receiver Operating Curves of the ADVANCE, KFRE, and PRE score

**Figure S3:** Regression coefficients ( $\beta$ ) of covariates included in the PRE score

**Supplement Table 1.** Identified renal risk scores that were developed in populations including patients with type 2 diabetes and/or diabetic kidney disease. The risk scores marked grey in the table below are used in the present study.

|                                 | <b>Year</b> | <b>Population</b>              | <b>Patients, <i>n</i></b> | <b>Events, <i>n</i></b> | <b>Predictors</b>                                                                                                                       | <b>Outcome</b>                                             |
|---------------------------------|-------------|--------------------------------|---------------------------|-------------------------|-----------------------------------------------------------------------------------------------------------------------------------------|------------------------------------------------------------|
| <b>Tangri et al.</b><br>[S1]    | 2011        | CKD stage 3-5                  | 3449                      | 386                     | eGFR, age, sex, UACR, albumin, phosphate, bicarbonate, calcium                                                                          | ESRD                                                       |
| <b>Jardine et al.</b><br>[S2]   | 2012        | T2D, high renal and/or CV risk | 11,140                    | 128                     | eGFR, retinopathy, sex, UACR, SBP, waist circumference, HbA1c, age at completion formal education                                       | Composite of DSCR to $\geq 200$ $\mu\text{mol/L}$ and ESRD |
| <b>Bidadkosh et al.</b><br>[S3] | 2017        | T2D, advanced CKD              | 861                       | 60                      | UACR, sCr, Hb, age, sex, NT-proBNP, hsTNT                                                                                               | Composite of ESRD and 40% eGFR decline                     |
| <b>Desai et al.</b><br>[S4]     | 2011        | T2D, anemia, CKD stage 3-4     | 995                       | 222                     | Age, sex, race, BMI, insulin use, eGFR, SUN, UPCR, albumin, prior stroke/PAD/HF, cardiac arrhythmia, Hb, CRP, prior AKI, NT-proBNP, TnT | ESRD                                                       |
| <b>Hoshino et al.</b><br>[S5]   | 2015        | T1D or T2D, CKD stage 1-5      | 205                       | NR                      | Pathological features based on renal biopsy                                                                                             | ESRD                                                       |
| <b>Johnson et al.</b><br>[S6]   | 2008        | CKD stage 3-4                  | 9782                      | 323                     | Age, sex, eGFR, diabetes, anemia, hypertension                                                                                          | ESRD                                                       |
| <b>Landray et al.</b><br>[S7]   | 2010        | CKD stage 3-5                  | 382                       | 190                     | Sex, UACR, phosphate, sCr                                                                                                               | ESRD                                                       |

|                                        |      |                                            |        |      |                                                                            |      |
|----------------------------------------|------|--------------------------------------------|--------|------|----------------------------------------------------------------------------|------|
| <b>Li et al.</b><br><b>[S8]</b>        | 2016 | T2D                                        | 604    | 22   | HbA1c, eGFR, proteinuria, VAP-1                                            | ESRD |
| <b>Schroeder et al.</b><br><b>[S9]</b> | 2017 | CKD stage 3-4                              | 22,460 | 737  | Age, sex, eGFR, Hb, proteinuria, SBP, antihypertensive treatment, diabetes | ESRD |
| <b>Xie et al.</b><br><b>[S10]</b>      | 2016 | CKD stage 3-5<br>Low socio-economic status | 28,779 | 1730 | Age, sex, race, eGFR, dipstick proteinuria                                 | ESRD |

T2D, type 2 diabetes; CKD, chronic kidney disease; CV, cardiovascular; DSCR, doubling of serum creatinine; ESRD, end-stage renal disease; UACR, urine albumin: urine creatinine ratio; sCr, serum creatinine; Hb, haemoglobin; NT-proBNP, N-terminal pro-brain natriuretic peptide; hsTNT, high sensitivity troponin T; BMI, body mass index; eGFR, estimated glomerular filtration rate; SUN, serum urea nitrogen; UPCR, urine protein: urine creatinine ratio, PAD; peripheral arterial disease; HF, heart failure; CRP, C-reactive protein; AKI, acute kidney injury; SBP, systolic blood pressure; HbA1c, glycated haemoglobin; VAP-1, vascular adhesion protein 1.

**Supplement Table 2A.** Characteristics of the populations used to develop the renal risk scores.

|                  | Study              | Population                     | Outcome                           | Patients, <i>n</i> | Events, <i>n</i>       | Median FU, y | Predictors                                                  | Validation ** |
|------------------|--------------------|--------------------------------|-----------------------------------|--------------------|------------------------|--------------|-------------------------------------------------------------|---------------|
| <b>KFRE</b>      | Tangri 2011 [S1]   | CKD stage 3-5                  | ESRD after 1, 3 and 5 y           | 3449               | 386                    | 2.1          | Age, sex, alb, eGFR, ACR, ca, phos, HCO <sub>3</sub>        | External      |
| <b>ADVANCE</b>   | Jardine 2012 [S2]  | T2D, high renal and/or CV risk | Composite renal outcome after 5 y | 11140              | 128                    | 4.4          | Sex, eGFR, retn, ACR, SBP, waist circ, HbA1c, education age | Internal      |
| <b>PRE score</b> | Parving 2012 [S11] | T2D, high renal and/or CV risk | Composite renal outcome / ESRD    | 4287               | ESRD: 110<br>Comp: 248 | 2.7          | ACR, SBP, HbA1c, Hb, uric acid, TC, BMI, K                  | External      |
|                  | Packham 2012 [S12] | T2D, overt proteinuria         | Composite renal outcome / ESRD    | 598                | ESRD: 9<br>Comp: 30    | 0.8          |                                                             |               |
|                  | Lewis 2001 [S13]   | T2D, overt proteinuria         | Composite renal outcome / ESRD    | 569                | ESRD: 101<br>Comp: 158 | 2.6          |                                                             |               |

\* Defined as a doubling of serum creatinine to  $\geq 200$   $\mu\text{mol/L}$  or ESRD

\*\* Internally validated scores are tested in the dataset used to develop the risk model. Externally validated scores are additionally tested in a different dataset that is not used for development.

**Supplement Table 2B.** Characteristics of the RENAAL clinical trial population.

| Study               | Inclusion criteria                     | Intervention                                   | Primary outcome                         | Event rate, <i>N/n (%)</i>                          | Median FU, y |
|---------------------|----------------------------------------|------------------------------------------------|-----------------------------------------|-----------------------------------------------------|--------------|
| <b>RENAAL [S14]</b> | T2D, ACR>300 mg/g<br>sCr 1.3-3.0 mg/dl | Losartan 100 mg/day<br>on top of standard care | Composite of<br>DSCR, ESRD and<br>death | Placebo: 359/762 (47.1)<br>Losartan: 327/751 (43.5) | 3.4          |

CKD, chronic kidney disease; T2D, type 2 diabetes; CV, cardiovascular; ESRD, end-stage kidney disease; FU, follow-up; alb, serum albumin; eGFR, estimated glomerular filtration rate; retn, retinopathy; ACR, urine albumin: urine creatinine ratio; ca, serum calcium; phos, serum phosphate; HCO<sub>3</sub>. Serum bicarbonate; SBP, systolic blood pressure; waist circ, waist circumference; HbA<sub>1c</sub>, glycated haemoglobin; education age, age at completion of formal education; Hb, haemoglobin; TC, total cholesterol; BMI, body mass index; K, potassium; sCr, serum creatinine; DSCR, doubling of serum creatinine.

**Supplement Figure 1.** Observed versus predicted risk for the composite renal outcome of doubling of serum creatinine to  $\geq 200$   $\mu\text{mol/L}$  or ESRD based on predictions by the ADVANCE risk score and the PRE score (A) and for the separate ESRD endpoint based on predictions by the KFRE and the PRE score (B).

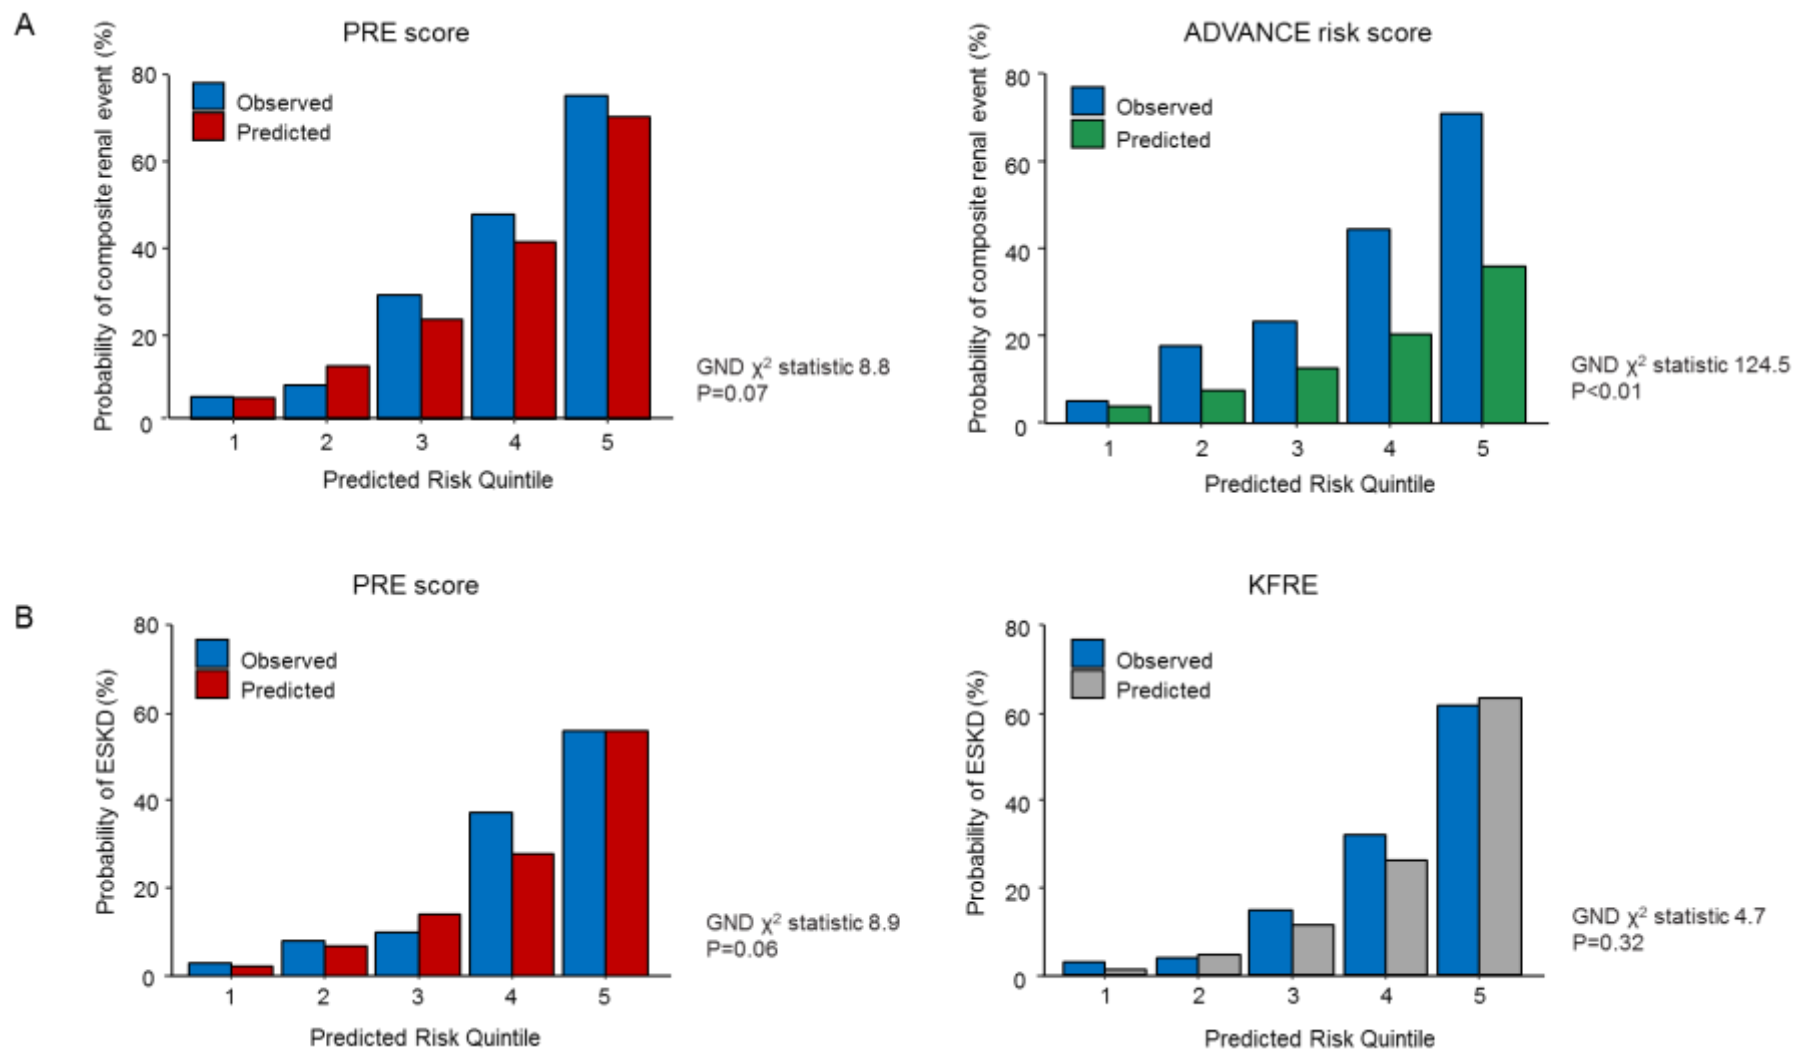

**Supplement Figure 2.** Receiver operating curves (ROC) for the composite renal endpoint of doubling of serum creatinine to  $\geq 200$   $\mu\text{mol/L}$  or ESRD based on predictions by the ADVANCE risk score and the PRE score (A) and for the separate ESRD endpoint based on predictions by the KFRE and the PRE score (B).

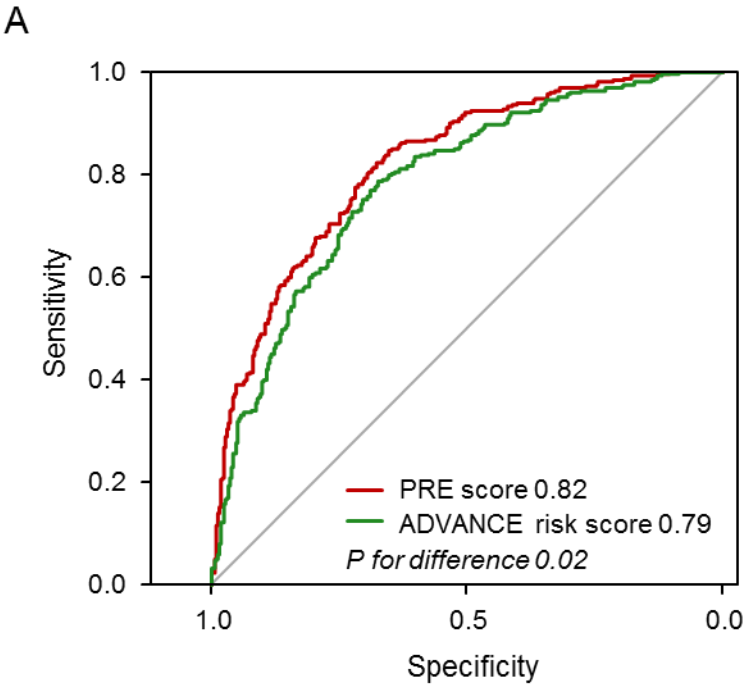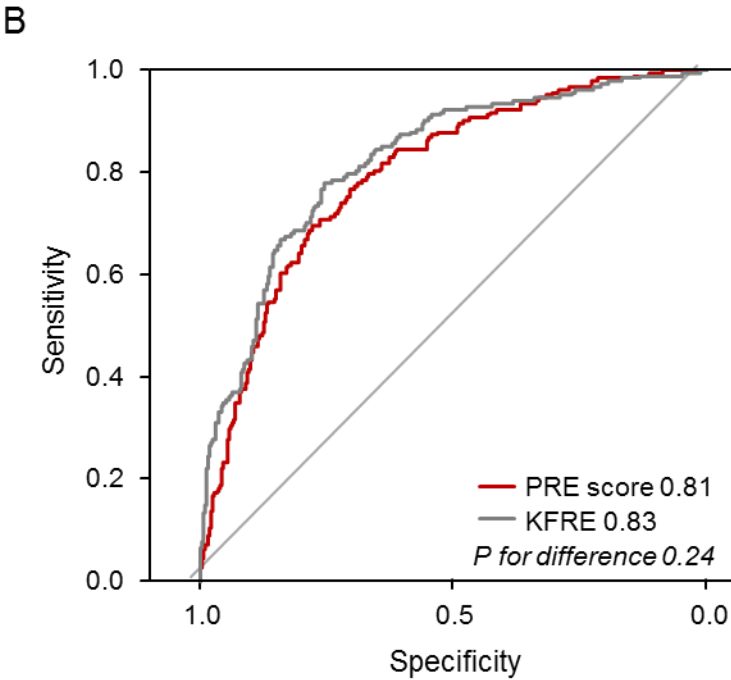

**Supplement Figure 3: Regression coefficients ( $\beta$ ) of covariates included in the PRE score are consistent in various patient subgroups from the background population used to derive the PRE score**

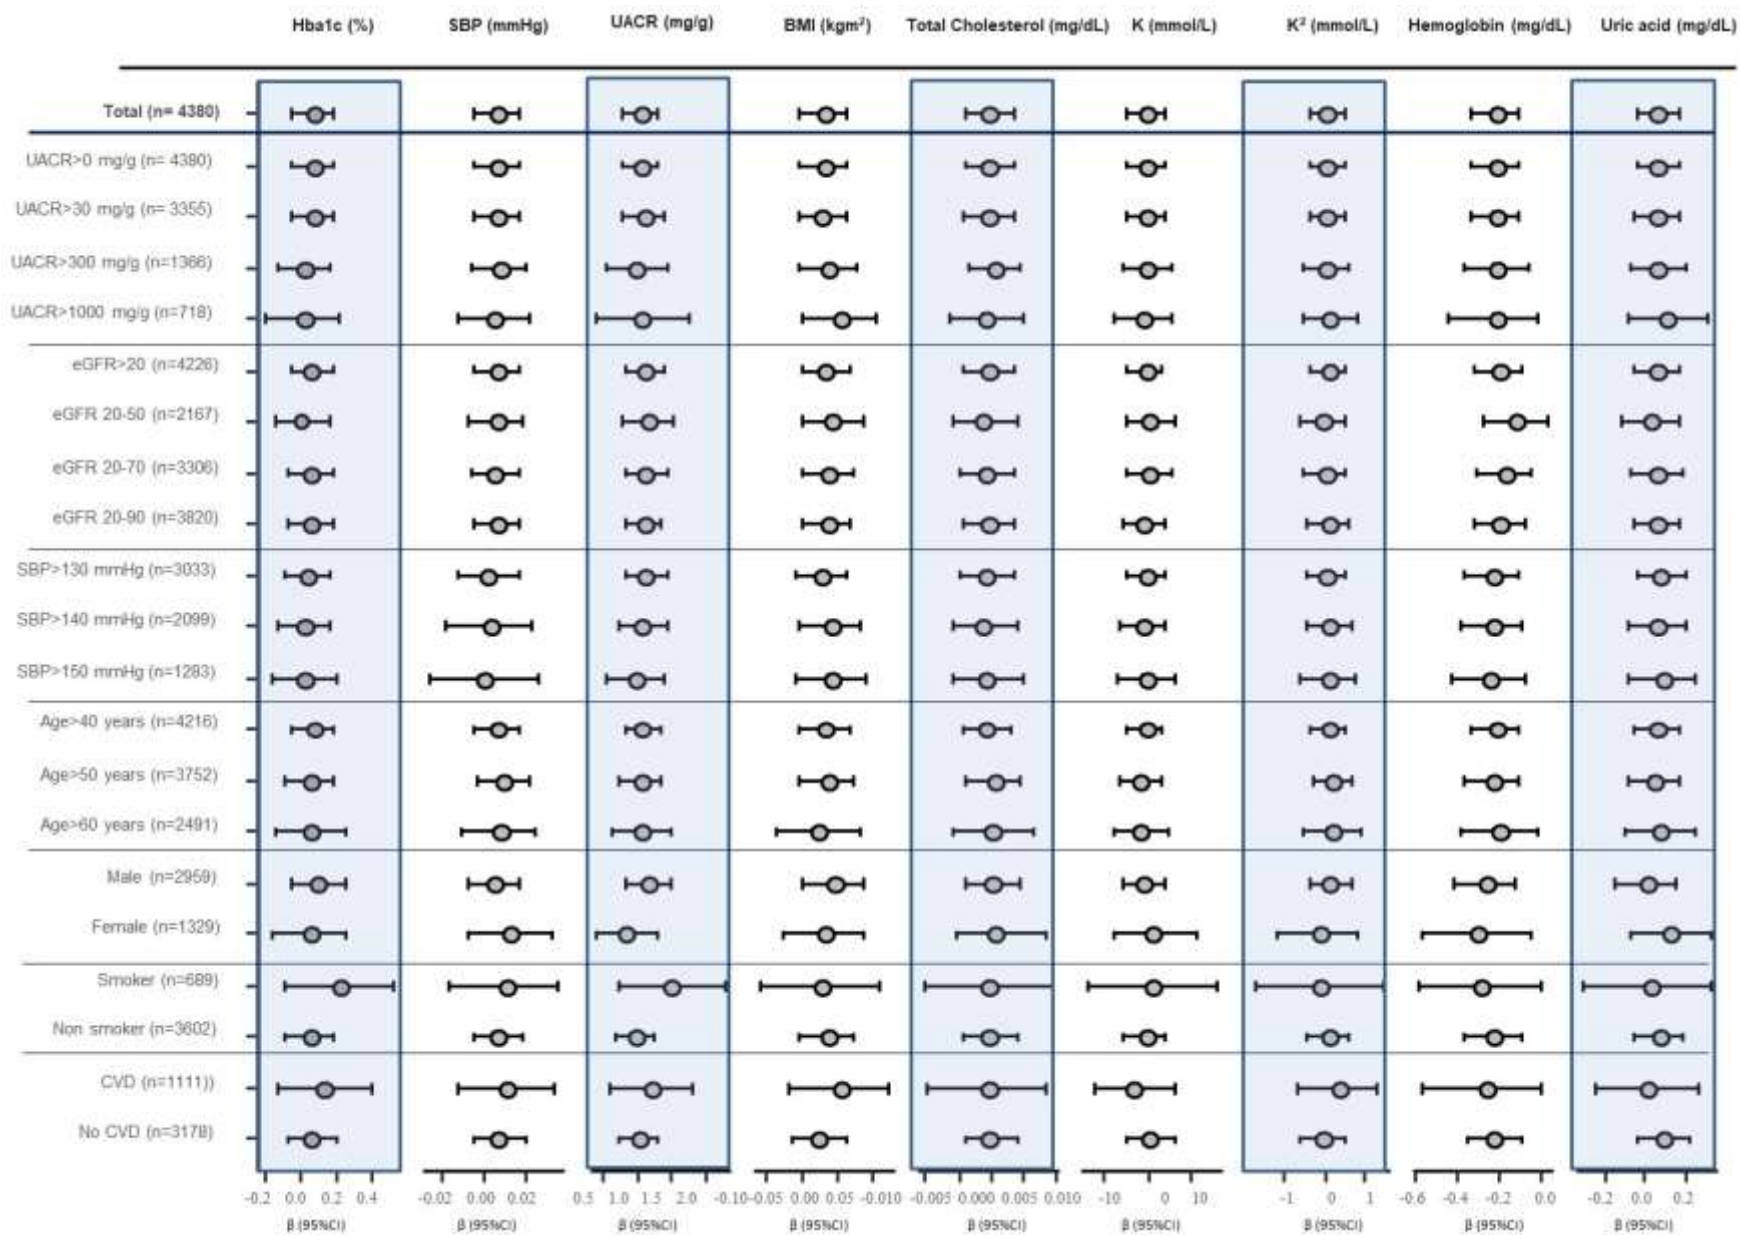



## Supplementary references

- S1. Tangri N, Stevens LA, Griffith J, Tighiouart H, Djurdjev O, Naimark D *et al.* A predictive model for progression of chronic kidney disease to kidney failure. *JAMA* 2011; 305: 1553-1559.
- S2. Jardine MJ, Hata J, Woodward M, Perkovic V, Ninomiya T, Arima H *et al.* Prediction of kidney-related outcomes in patients with type 2 diabetes. *Am J Kidney Dis* 2012; 60: 770-778.
- S3. Bidarkosh A, Lambooy SPH, Heerspink HJ, Pena MJ, Henning RH, Buikema H *et al.* Predictive Properties of Biomarkers GDF-15, NTproBNP, and hs-TnT for Morbidity and Mortality in Patients With Type 2 Diabetes With Nephropathy. *Diabetes Care* 2017; 40: 784-792.
- S4. Desai AS, Toto R, Jarolim P, Uno H, Eckardt KU, Kewalramani R *et al.* Association between cardiac biomarkers and the development of ESRD in patients with type 2 diabetes mellitus, anemia, and CKD. *Am J Kidney Dis* 2011; 58: 717-728.
- S5. Hoshino J, Mise K, Ueno T, Imafuku A, Kawada M, Sumida K *et al.* A pathological scoring system to predict renal outcome in diabetic nephropathy. *Am J Nephrol* 2015; 41: 337-344.
- S6. Johnson ES, Thorp ML, Platt RW, Smith DH. Predicting the risk of dialysis and transplant among patients with CKD: a retrospective cohort study. *Am J Kidney Dis* 2008; 52: 653-660.
- S7. Landray MJ, Emberson JR, Blackwell L, Dasgupta T, Zakeri R, Morgan MD *et al.* Prediction of ESRD and death among people with CKD: the Chronic Renal Impairment in Birmingham (CRIB) prospective cohort study. *Am J Kidney Dis* 2010; 56: 1082-1094.
- S8. Li HY, Lin HA, Nien FJ, Wu VC, Jiang YD, Chang TJ *et al.* Serum Vascular Adhesion Protein-1 Predicts End-Stage Renal Disease in Patients with Type 2 Diabetes. *PLoS One* 2016; 11: e0147981.
- S9. Schroeder EB, Yang X, Thorp ML, Arnold BM, Tabano DC, Petrik AF *et al.* Predicting 5-Year Risk of RRT in Stage 3 or 4 CKD: Development and External Validation. *Clin J Am Soc Nephrol* 2017; 12: 87-94.
- S10. Xie Y, Maziarz M, Tuot DS, Chertow GM, Himmelfarb J, Hall YN. Risk prediction to inform surveillance of chronic kidney disease in the US Healthcare Safety Net: a cohort study. *BMC Nephrol* 2016; 17: 57-016-0272-0.
- S11. Parving HH, Brenner BM, McMurray JJ, de Zeeuw D, Haffner SM, Solomon SD *et al.* Cardiorenal end points in a trial of aliskiren for type 2 diabetes. *N Engl J Med* 2012; 367: 2204-2213.
- S12. Packham DK, Wolfe R, Reutens AT, Berl T, Heerspink HL, Rohde R *et al.* Sulodexide fails to demonstrate renoprotection in overt type 2 diabetic nephropathy. *J Am Soc Nephrol* 2012; 23: 123-130.
- S13. Lewis EJ, Hunsicker LG, Clarke WR, Berl T, Pohl MA, Lewis JB *et al.* Renoprotective effect of the angiotensin-receptor antagonist irbesartan in patients with nephropathy due to type 2 diabetes. *N Engl J Med* 2001; 345: 851-860.

S14. Brenner BM, Cooper ME, de Zeeuw D, Keane WF, Mitch WE, Parving HH *et al.*  
Effects of losartan on renal and cardiovascular outcomes in patients with type 2 diabetes and nephropathy. *N Engl J Med* 2001; 345: 861-869.
